# Supplementary material
Source: PubMed Central journal article supplement (PMC8217149)
Supplement: NIHMS1681305-supplement-Appendix_Table.pdf [file NIHMS1681305-supplement-Appendix_Table.pdf]

**APPENDIX Table 1. The Argentinian draft FOP legislation**

Based on best practices, this bill is comparable with the Mexican FOP label law but even more comprehensive.

- Each excessive critical nutrient has a black octagon warning label, for example, “Excess sugar,” “Excess sodium,” “Excess saturated fat,” “Excess total fat,” “Excess calories.”
- Foods and beverages with sweeteners must bear the warning “Contains sweeteners, not recommended for children.”
- Foods and beverages with caffeine must bear the warning “Contains caffeine. Avoid in children.”
- Packages must display the Pan American Health Organization Nutrient Profile Model.
- A declaration of all sugars in the food or beverage is mandatory.
- Foods and beverages with any warning label are prohibited from displaying complementary nutritional information; claims, logos, endorsements of scientific associations or civil societies; or images of children’s characters, animations, celebrities, or athletes, among others.
- Foods and beverages with any warning label are prohibited from advertising, promotions, and sponsorships specifically directed to children.
- Foods and beverages with any warning label may not be offered, marketed, advertised, promoted, or sponsored in schools.
- Food assistance programs for vulnerable populations must prioritize purchases of foods and beverages without warning labels.
